# Supplementary material for: Mesoscopic CH3NH3PbI3 perovskite solar cells using TiO2 inverse opal electron-conducting scaffolds
Source: Royal Society of Chemistry journal article supplement (doi:10.1039/c6ta07004c), 2016-11-07
Supplement: c6ta07004c1.pdf [file c6ta07004c1.pdf]

SUPPPORTING INFORMATION

Mesoscopic  $\text{CH}_3\text{NH}_3\text{PbI}_3$  perovskite solar cells using  
 $\text{TiO}_2$  inverse opal electron conducting scaffold

Su-Jin Ha,<sup>a,#</sup> Jin Hyuck Heo,<sup>b,#</sup> Sang Hyuk Im, <sup>\*,b</sup> Jun Hyuk Moon<sup>\*,a</sup>

<sup>a</sup> Department of Chemical and Biomolecular Engineering, Sogang University, 1 Sinsu-dong, Mapo-gu, Seoul, 121-742, Republic of Korea

<sup>b</sup> Functional Crystallization Center (ERC), Department of Chemical Engineering, Kyung Hee University, 1732 Deogyong-daero, Giheung-gu, Yongin-si, Gyeonggi-do 446-701, Republic of Korea

Corresponding author, E-mail:imromy@khu.ac.kr, junhyuk@sogang.ac.kr

# S.-J. Ha and J. H. Heo have equally contributed to this study.

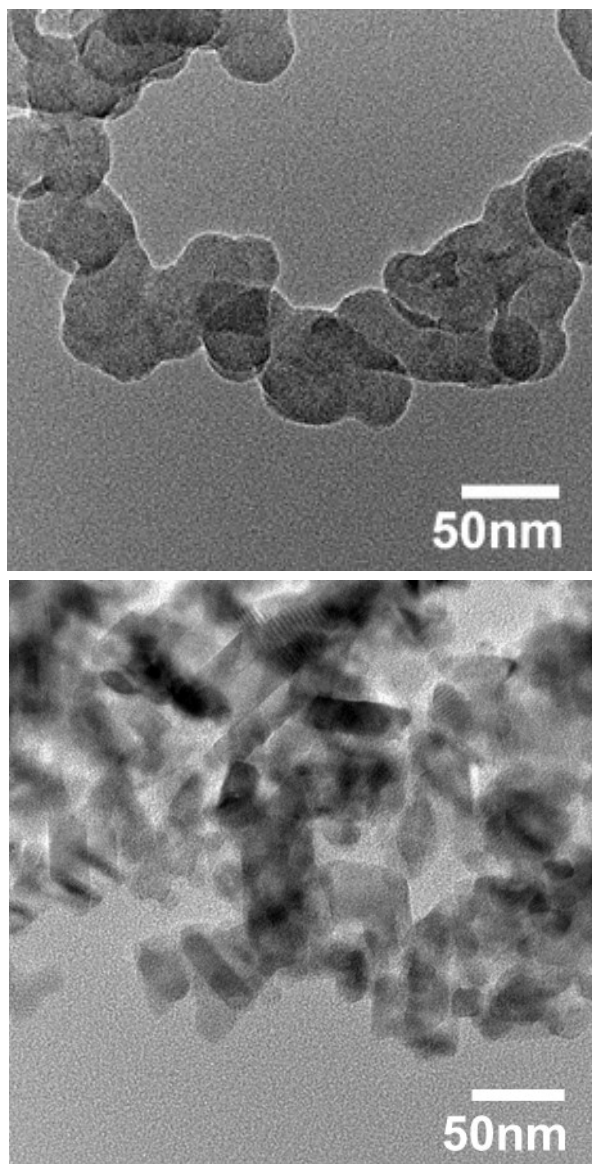

**Figure S1.** TEM image of (up) the meso-IO film and (down) NP TiO<sub>2</sub> film.

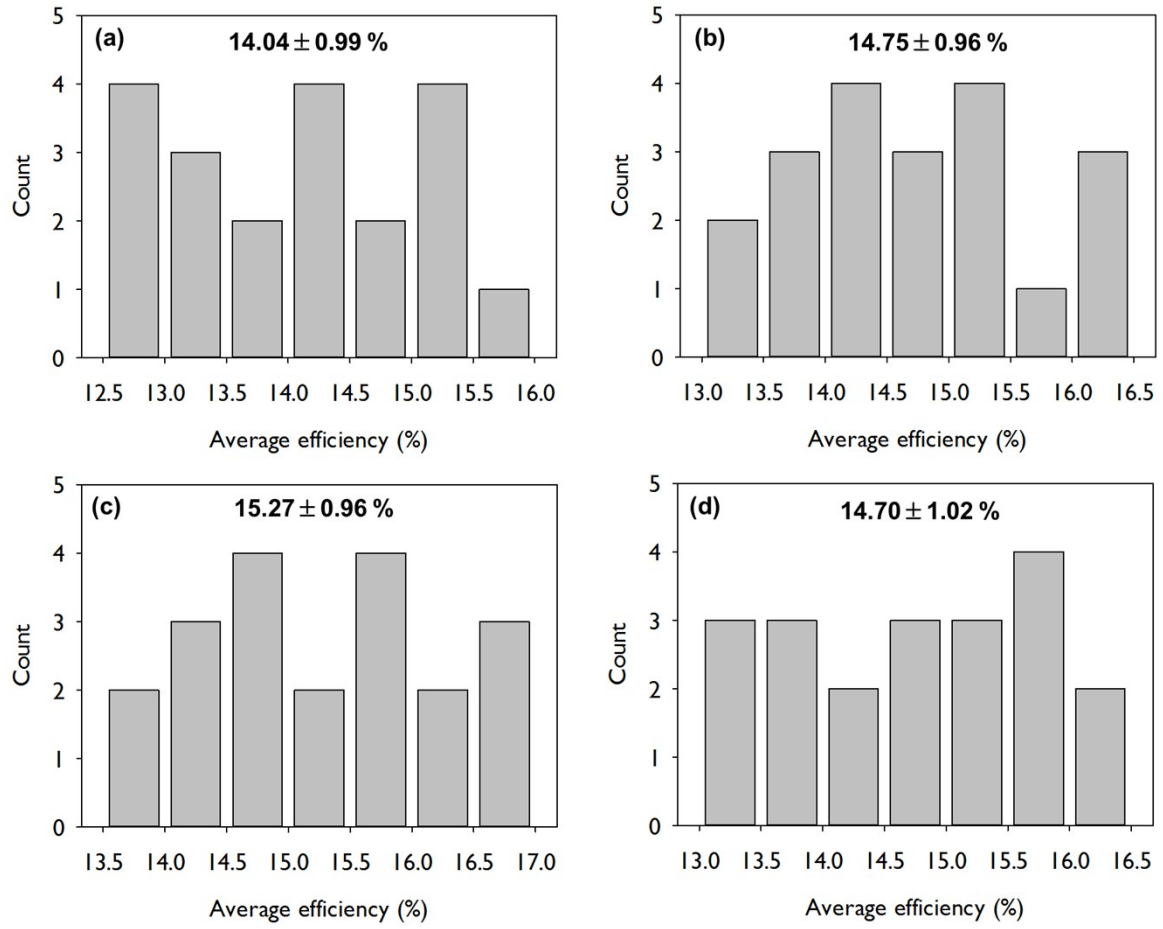

**Figure S2.** The average efficiency deviation of 20 samples indicating that (a) 400 nm, (b) 500nm, (c) 600nm, and (d) 800 nm-thick meso-IO based solar cells.

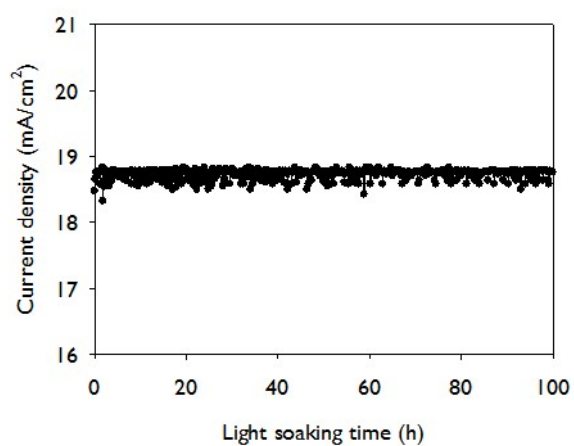

**Figure S3.** The current density of meso-IO TiO<sub>2</sub>-based perovskite solar cells measured under light soaking for 100 hrs.

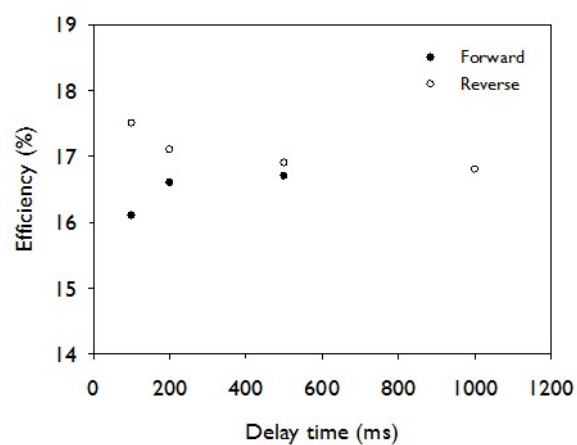

**Figure S4.** The power conversion efficiency during forward and reverse scan with different delay time for 600nm thick-meso-IO TiO<sub>2</sub> scaffold.
